# Supplementary material for: New Isocoumarin Derivatives and Meroterpenoids from the Marine Sponge-Associated Fungus Aspergillus similanensis sp. nov. KUFA 0013
Source: PubMed Central journal article supplement (PMC4210891; doi:10.3390/md12105160), 2014-10-13
Supplement: marinedrugs-12-05160-s001.pdf [file marinedrugs-12-05160-s001.pdf]

# Supplementary Information

**Figure S1.**  $^1\text{H}$  NMR spectrum of compound **1** ( $\text{CDCl}_3$ , 500.13 MHz).

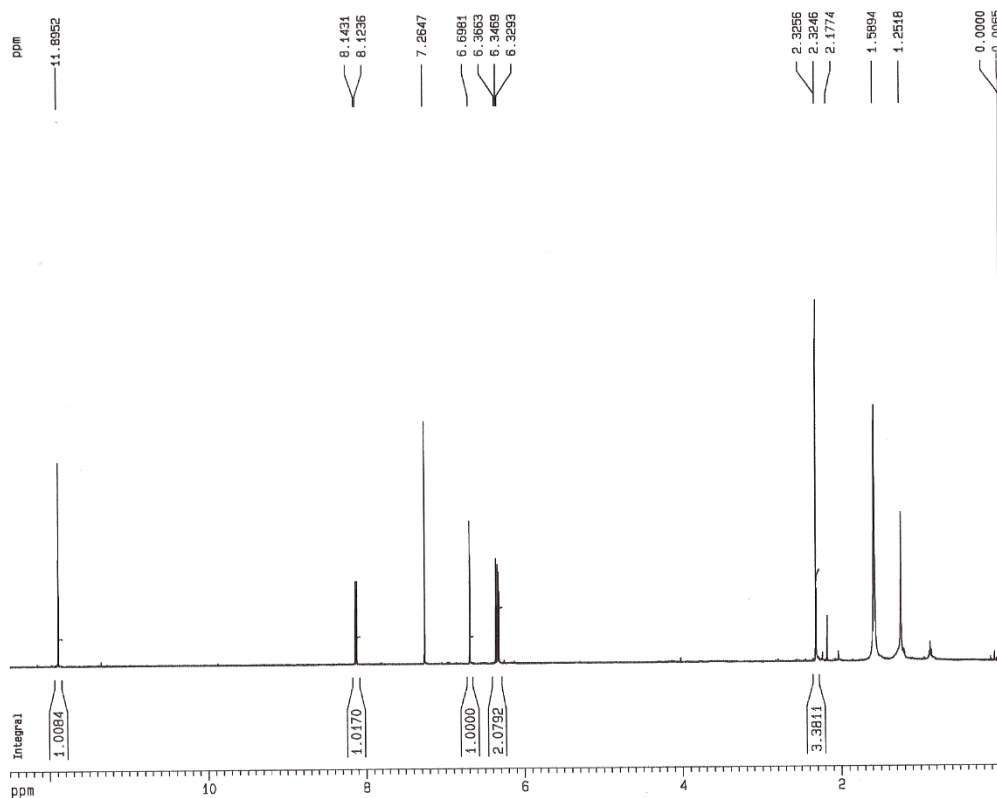

**Figure S2.**  $^{13}\text{C}$  NMR spectrum of compound **1** ( $\text{CDCl}_3$ , 125.8 MHz).

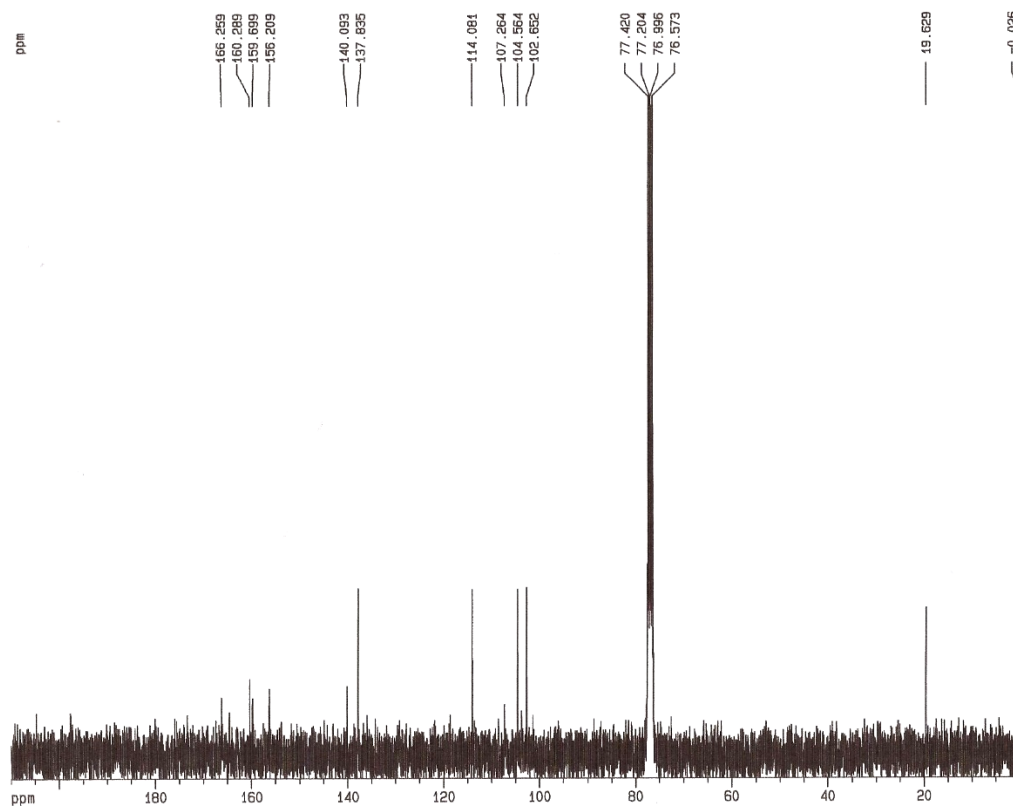

**Figure S3.** COSY spectrum of compound **1** (CDCl<sub>3</sub>, 500.13 MHz).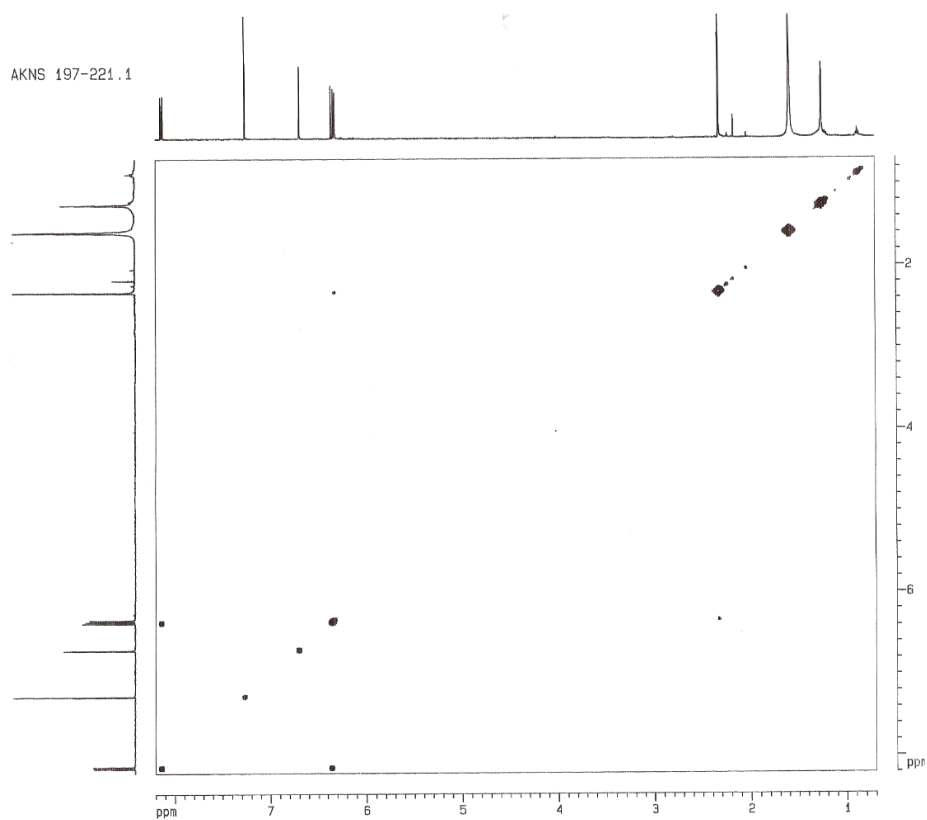**Figure S4.** HSQC spectrum of compound **1** (CDCl<sub>3</sub>, 500.13 MHz).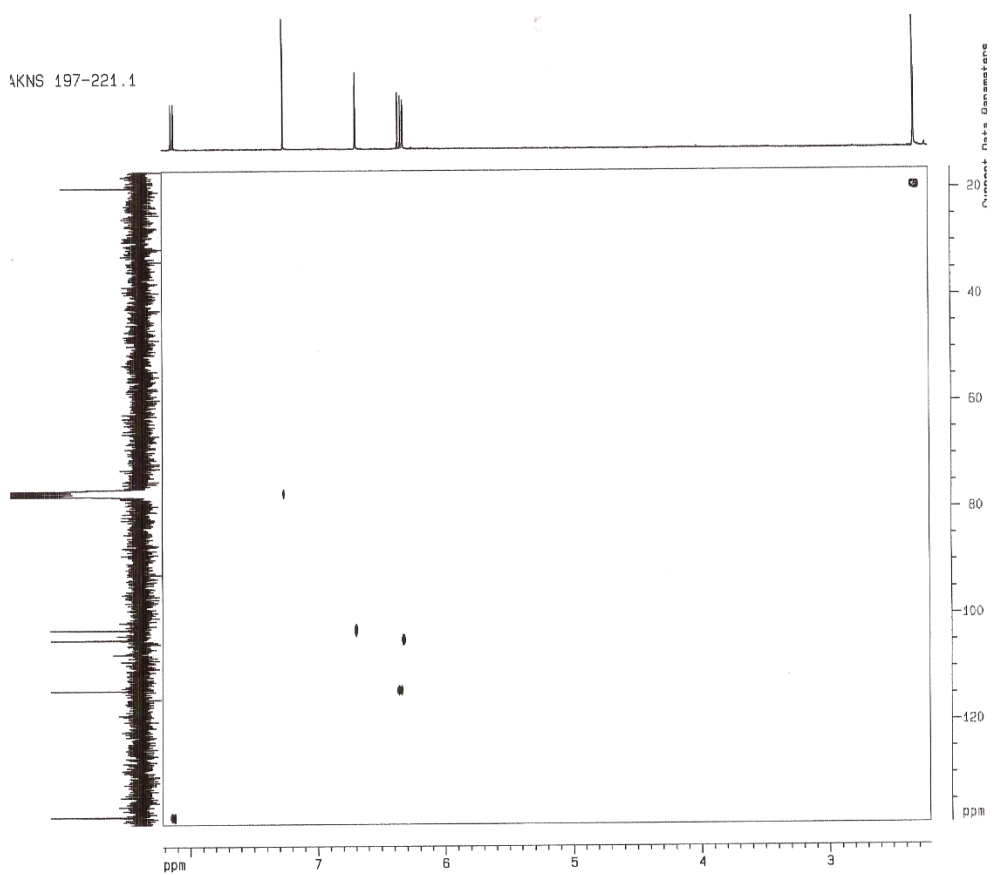

**Figure S5.** HMBC spectrum of compound **1** (CDCl<sub>3</sub>, 500.13 MHz).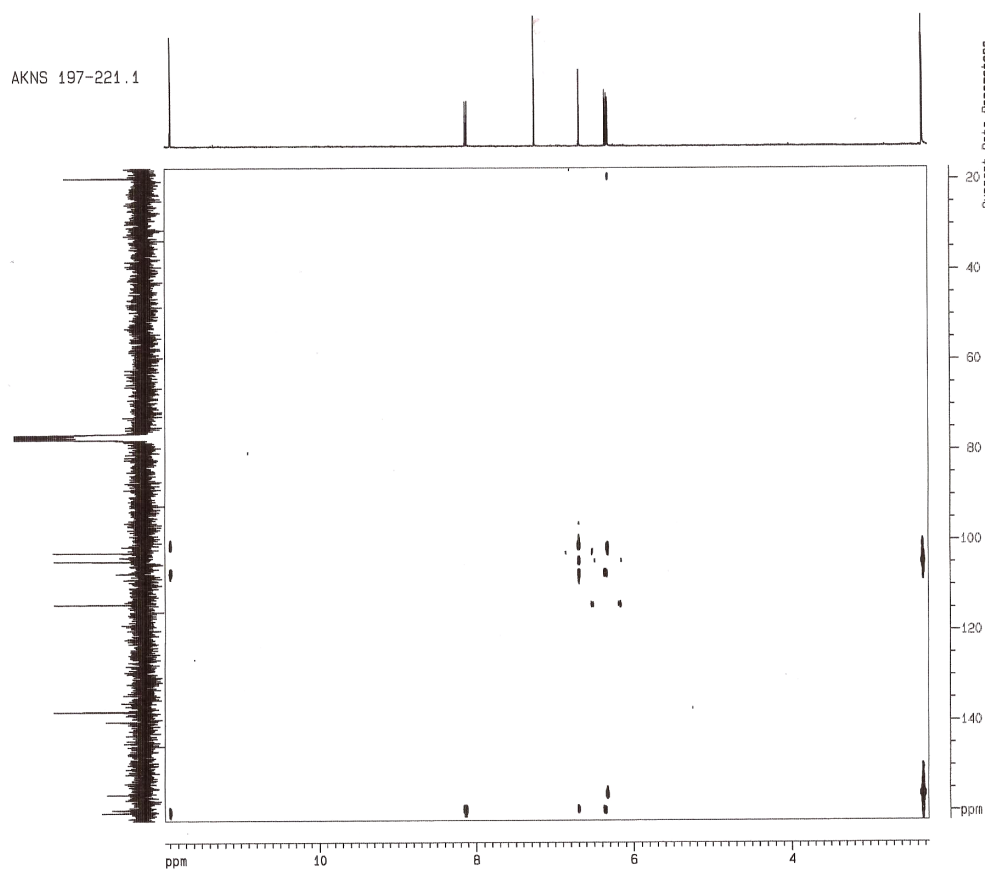**Figure S6.** <sup>1</sup>H NMR spectrum of compound **2b** (CDCl<sub>3</sub>, 500.13 MHz).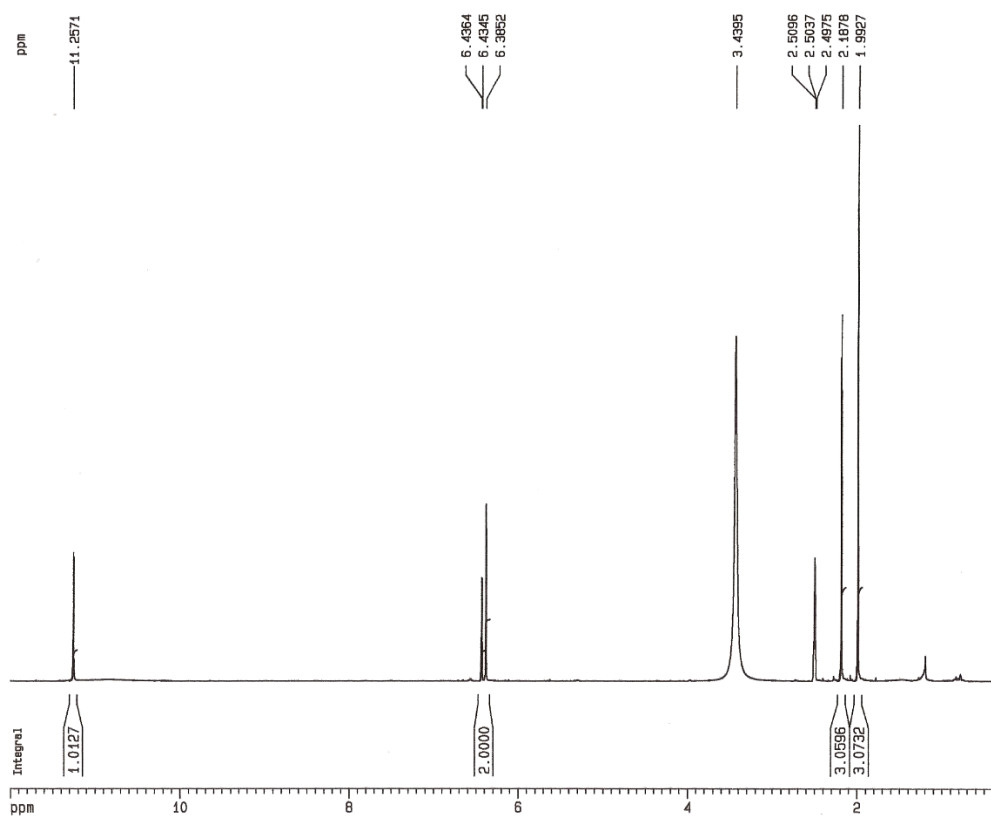

**Figure S7.**  $^{13}\text{C}$  NMR spectrum of compound **2b** ( $\text{CDCl}_3$ , 125.8 MHz).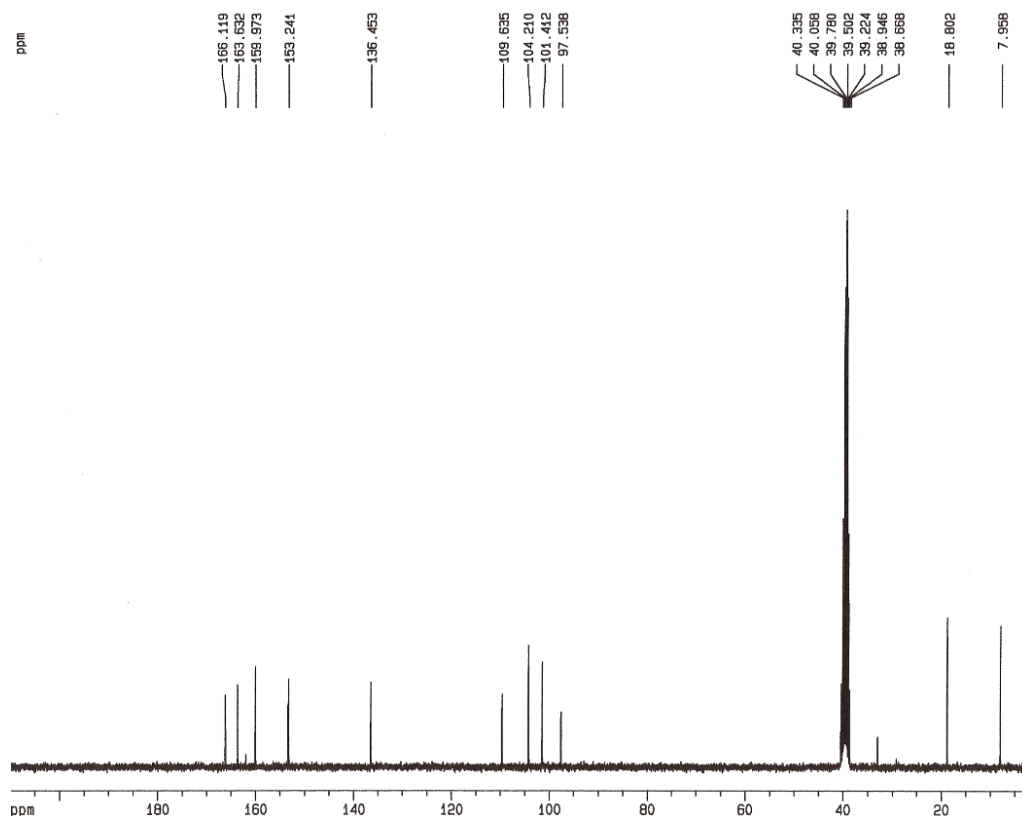**Figure S8.**  $^1\text{H}$  NMR spectrum of compound **3** ( $\text{CDCl}_3$ , 500.13 MHz).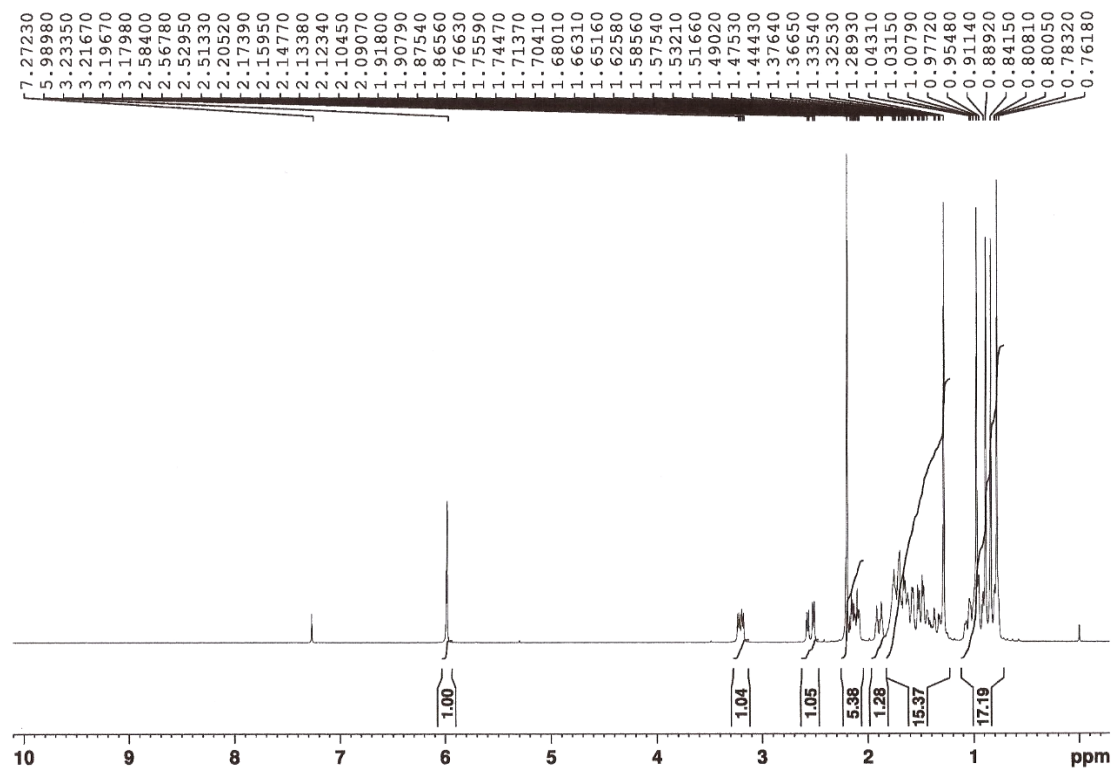

**Figure S9.**  $^{13}\text{C}$  NMR spectrum of compound **3** ( $\text{CDCl}_3$ , 125.8 MHz).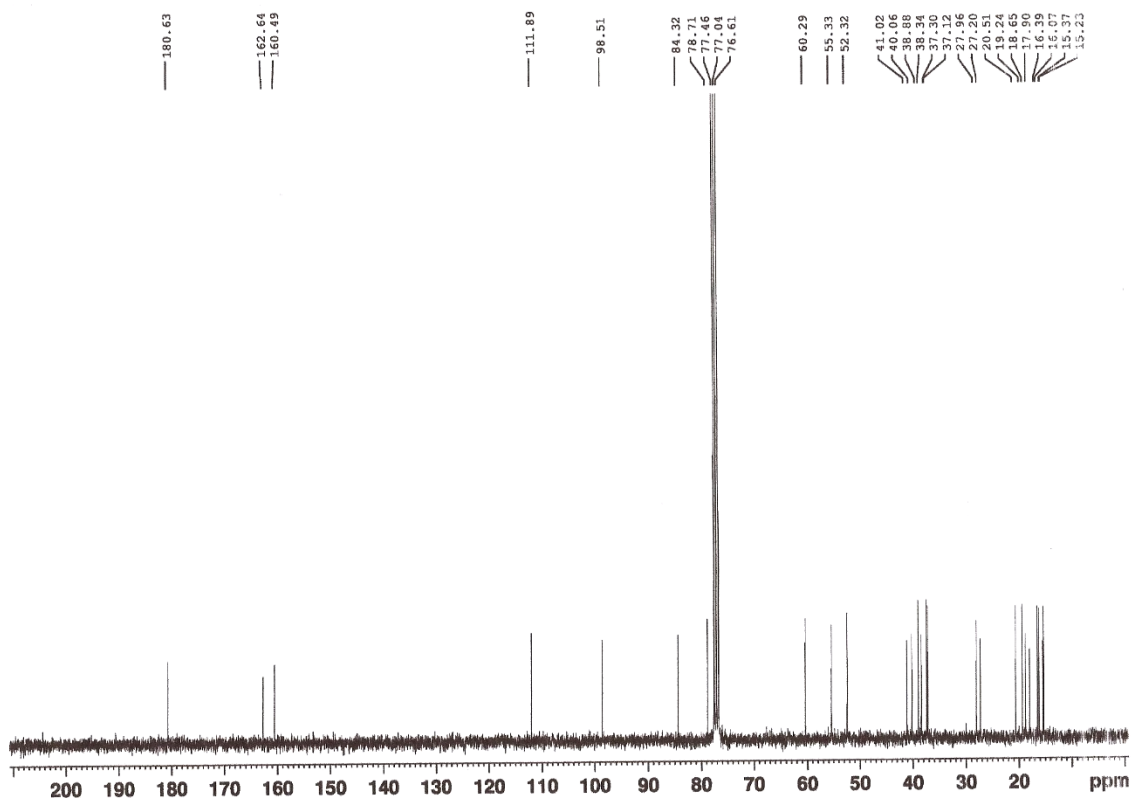**Figure S10.**  $^1\text{H}$  NMR spectrum of compound **6** ( $\text{CDCl}_3$ , 500.13 MHz).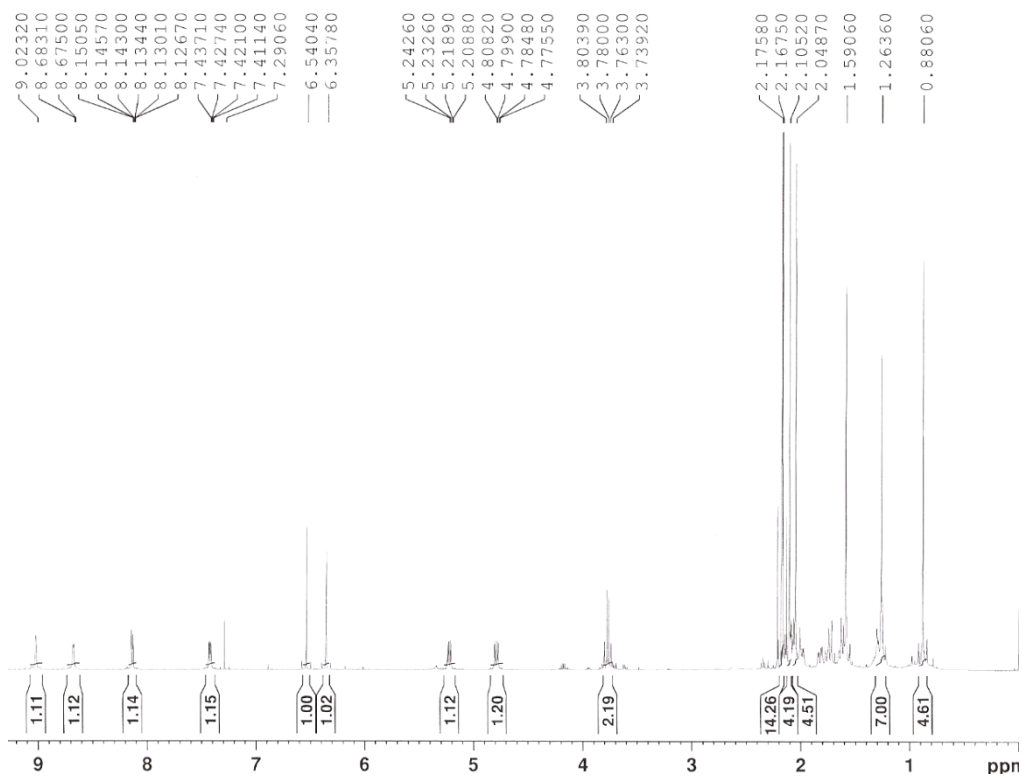

**Figure S11.**  $^{13}\text{C}$  NMR spectrum of compound **6** ( $\text{CDCl}_3$ , 125.8 MHz).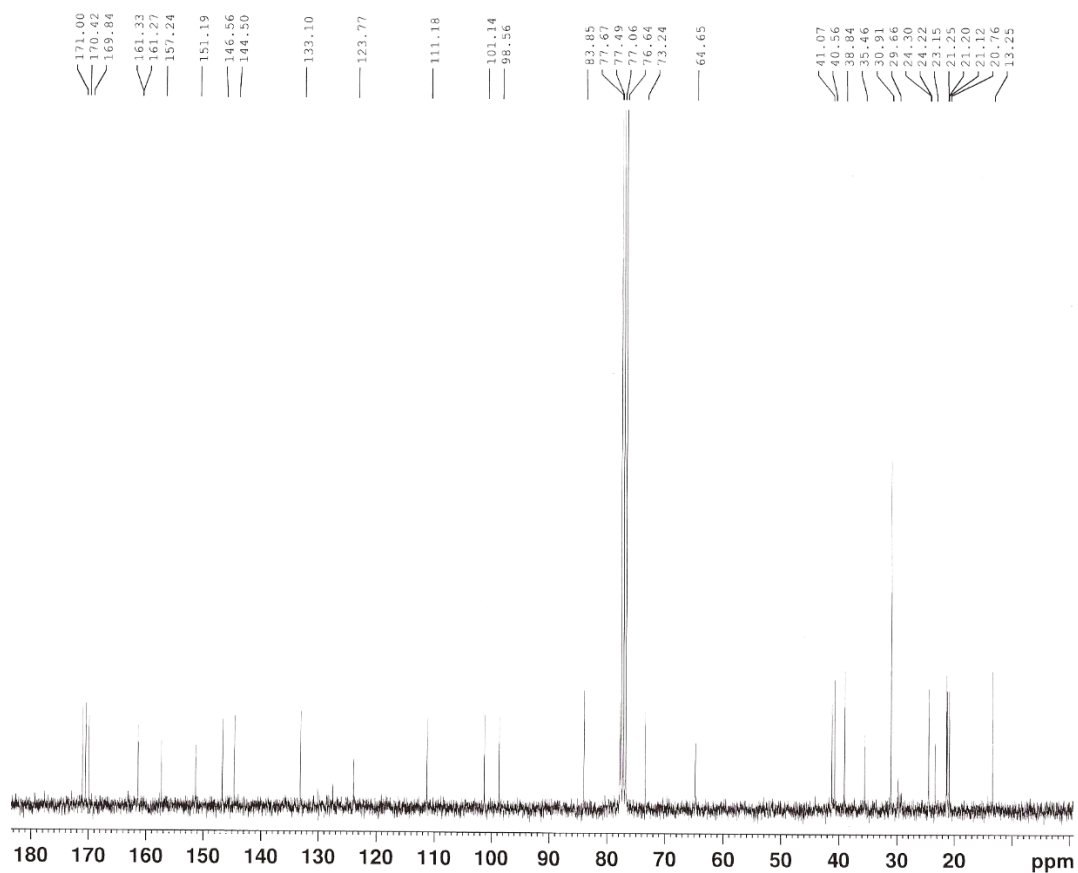

© 2014 by the authors; licensee MDPI, Basel, Switzerland. This article is an open access article distributed under the terms and conditions of the Creative Commons Attribution license (<http://creativecommons.org/licenses/by/3.0/>).
